# Supplementary material
Source: PubMed Central journal article supplement (PMC7655293)
Supplement: 18-00309.pdf [file 18-00309.pdf]

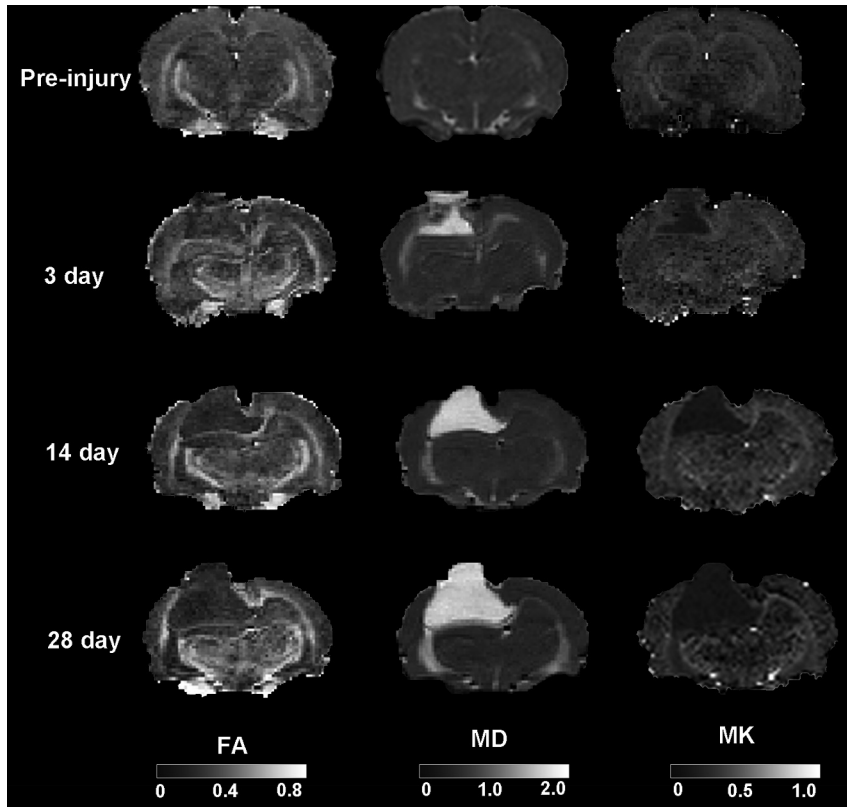

**ON-LINE FIG 1.** FA, MD, and MK maps of representative rat brains at preinjury and 3, 14, and 28 days after TBI.

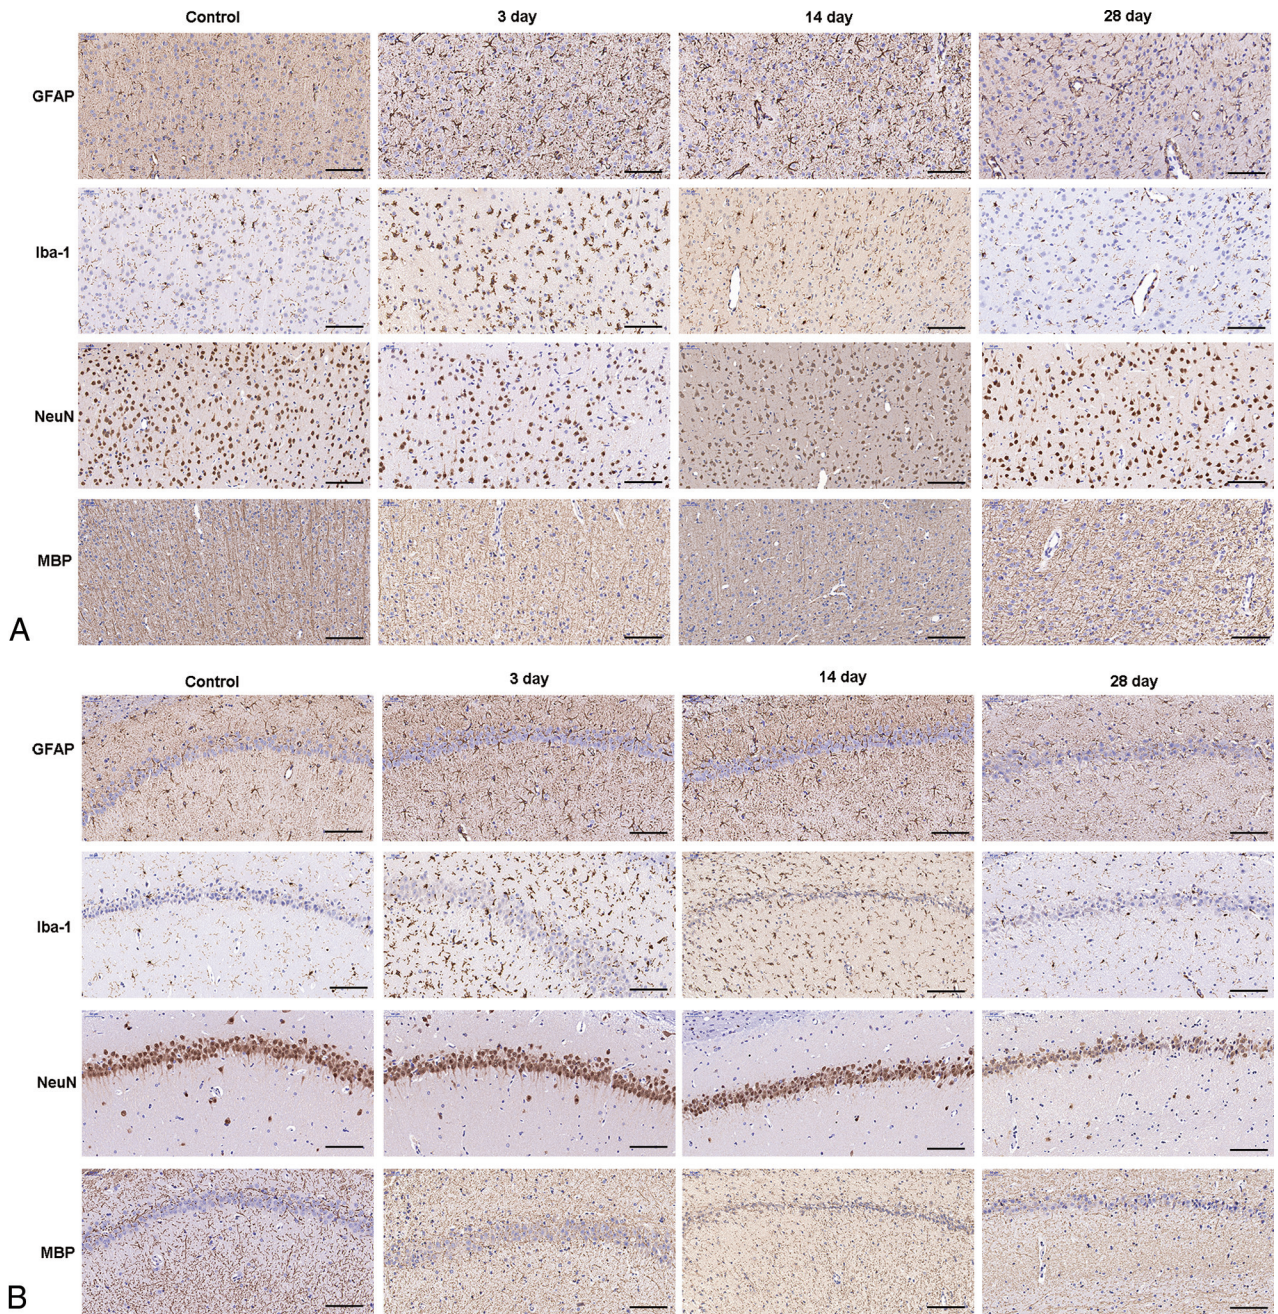

**ON-LINE FIG 2.** IHC of NeuN, GFAP, Iba-1, and MBP using DAB (3, 3'-diaminobenzidine) for staining in the ipsilateral perilesional cortex (A), ipsilateral hippocampus (B), and callosum (C) in representative control and TBI rat brain sections. Scale bar = 100  $\mu$ m.

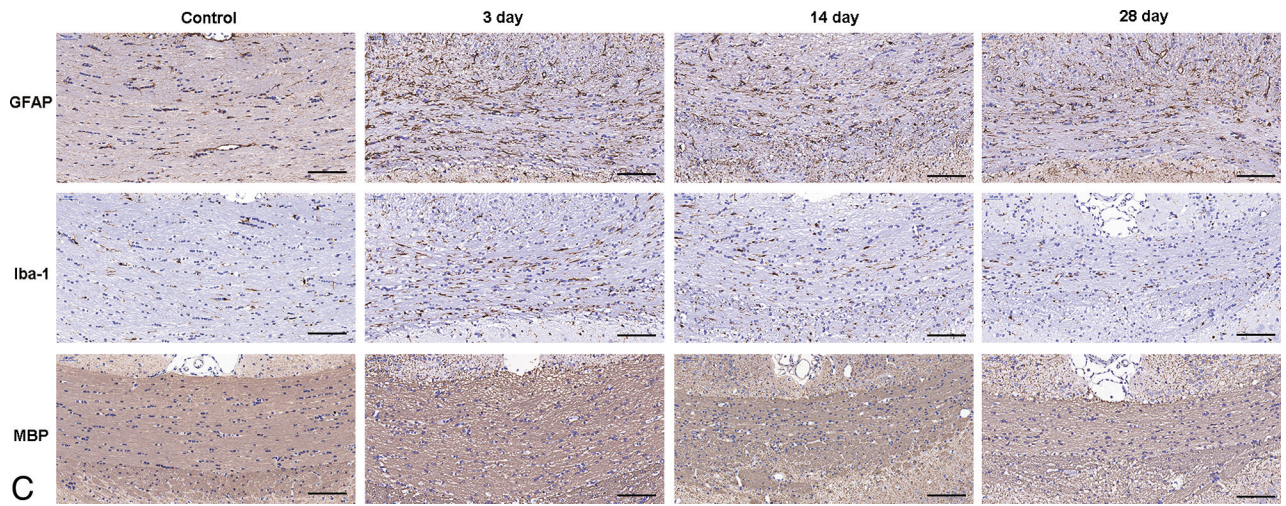

**ON-LINE FIG 2.** Continued.
